1 Telacebec for ultra-short treatment of Buruli ulcer in a mouse model

2

3 Deepak V. Almeida<sup>a</sup>, Paul J. Converse<sup>a</sup>, Till F. Omansen<sup>a,b</sup>, Sandeep Tyagi<sup>a</sup>, Rokeya Tasneen<sup>a</sup>,

4 Jeongjun Kim<sup>c</sup> and Eric L. Nuermberger<sup>a</sup>

5

6 Center for Tuberculosis Research, Department of Medicine, Johns Hopkins University,

7 Baltimore, Maryland, USA<sup>a</sup>; Infectious Diseases Unit, Department of Internal Medicine,

8 University of Groningen, Groningen, The Netherlands<sup>b</sup>; Qurient Co. Ltd., Korea<sup>c</sup>

9

10 Running head: Telacebec in treatment of Buruli ulcer

11

12 # Address correspondence to: Dr. Eric Nuermberger, enuermb@jhmi.edu

13

14

15

16

17

18

19

20

21

22

23

24 **ABSTRACT**

25 Telacebec (Q203) is a new anti-tubercular drug with extremely potent activity against  
26 *Mycobacterium ulcerans*. Here, we explored the treatment-shortening potential of Q203 alone or  
27 in combination with rifampin (RIF) in a mouse footpad infection model. The first study  
28 compared Q203 at 5 and 10 mg/kg doses alone and with rifampin. Q203 alone rendered most  
29 mouse footpads culture-negative in 2 weeks. Combining Q203 with rifampin resulted in relapse-  
30 free cure 24 weeks after completing 2 weeks of treatment, compared to a 25% relapse rate in  
31 mice receiving RIF+clarithromycin, the current standard of care, for 4 weeks.

32 The second study explored the dose-ranging activity of Q203 alone and with RIF,  
33 including the extended activity of Q203 after treatment discontinuation. The bactericidal activity  
34 of Q203 persisted for  $\geq 4$  weeks beyond the last dose. All mice receiving just 1 week of Q203 at  
35 2-10 mg/kg were culture-negative 4 weeks after stopping treatment. Mice receiving 2 weeks of  
36 Q203 at 0.5, 2 and 10 mg/kg were culture-negative 4 weeks after treatment. RIF did not increase  
37 the efficacy of Q203. A pharmacokinetics sub-study revealed that Q203 doses of 2-10 mg/kg in  
38 mice produce plasma concentrations similar to those produced by 100-300 mg doses in humans,  
39 with no adverse effect of RIF on Q203 concentrations.

40 These results indicate the extraordinary potential of Q203 to reduce the duration of  
41 treatment necessary for cure to  $\leq 1$  week (or 5 doses of 2-10 mg/kg) in our mouse footpad  
42 infection model and warrant further evaluation of Q203 in clinical trials.

43

44

45

46

## 47 **Introduction**

48           The World Health Organization's recommended treatment for Buruli ulcer (BU), also  
49 known as *Mycobacterium ulcerans* disease, recently evolved from an 8-week regimen of  
50 rifampin (RIF, R) at 10 mg/kg of body weight plus streptomycin (STR) to an 8-week regimen of  
51 RIF plus clarithromycin (CLR, C) to eliminate the need for the injectable agent STR and to avoid  
52 its related ototoxicity (1, 2). However, CLR has more limited activity than STR against *M.*  
53 *ulcerans* in mouse models of the disease and RIF induces the metabolism of CLR, which likely  
54 limits the contribution of CLR to the regimen (3-5). Nonetheless, clinical studies have shown  
55 good efficacy of the RIF+CLR regimen (6).

56           Despite the success of the RIF+CLR regimen, shortening the duration of BU treatment  
57 remains an important research objective. We previously investigated replacement of STR and/or  
58 CLR with other drugs such as clofazimine and oxazolidinones in our mouse footpad infection  
59 model, as well as the impact of increasing rifamycin exposures using high-dose RIF or  
60 rifapentine (RPT), with the aim of reducing the treatment duration necessary for cure (7-12).  
61 Although we identified novel combinations with efficacy superior to RIF+STR and/or  
62 RIF+CLR, none of these 2-drug combinations showed a potential to reduce the duration of  
63 treatment to less than 4 weeks in mice.

64           Telacebec (Q203, Q) is a new drug developed to treat tuberculosis by targeting the  
65 respiratory cytochrome bc<sub>1</sub>:aa<sub>3</sub> complex (13). In *in vitro* and mouse models of tuberculosis,  
66 Q203 often exhibits bacteriostatic, rather than bactericidal, activity due to the presence of an  
67 alternative terminal oxidase, the cytochrome *bd* oxidase, that maintains electron transport chain  
68 (ETC) function and preserves viability (14). However, unlike *Mycobacterium tuberculosis*,  
69 classical strains of *M. ulcerans* have a naturally occurring mutation in the *cydA* gene that renders

70 the cytochrome *bd* oxidase non-functional (15). Therefore, most *M. ulcerans* strains causing BU  
71 are exquisitely susceptible to Q203 with very low MICs of 0.000075-0.00015 µg/ml (16, 17). *In*  
72 *vivo* studies also show Q203 to be a very attractive candidate for treatment of BU. Scherr et al.  
73 (17) showed that Q203 alone at a daily dose of just 0.5 mg/kg was as effective as RIF+STR and  
74 rendered 9/10 mice culture-negative with 8 weeks of treatment. Seeking a novel treatment-  
75 shortening regimen, we tested Q203 at 10 mg/kg/day in 3- and 4-drug combinations with high-  
76 dose RPT and other drugs acting on the ETC and oxidative phosphorylation (clofazimine (CFZ),  
77 and bedaquiline (BDQ)) and found that mouse footpads were sterilized after just 2 weeks of  
78 treatment (16).

79 In the present work, we explored the treatment-shortening potential of simpler, more  
80 readily implementable regimens based on Q203 alone or in combination with RIF. Two  
81 sequential experiments in the mouse footpad infection model assessed the dose-ranging efficacy  
82 of Q203 with or without normal and high-dose rifampin in tandem with pharmacokinetics (PK)  
83 analysis to better understand the human-equivalent doses. The results demonstrate that Q203  
84 exposures recently demonstrated in phase 1 trials (18), are capable of sterilizing mouse footpads  
85 after as little as 1 week of treatment (5 doses), making Q203 an extraordinary candidate for  
86 clinical trials to shorten BU treatment.

87

## 88 **Results**

89 *Study 1: To determine the sterilizing efficacy of combining Q203 with standard and high doses of*  
90 *rifampin.*

91 To determine if replacing CLR with Q203 in the RIF+CLR regimen has the potential to shorten  
92 the treatment of BU, we assessed the sterilizing efficacy of Q203 at 5 or 10 mg/kg when  
93 combined with RIF at 10 and 20 mg/kg doses.

94 Footpad swelling and CFU counts: Mean ( $\pm$  SD) footpad CFU counts on the day after infection  
95 were  $2.71 \pm 0.93 \log_{10}$  CFU/footpad. Six weeks later, at the start of treatment (D0), the median  
96 swelling grade was  $\geq 2.5$  on a scale of 0-4 (10, 19) (Fig. 1) and the mean CFU count reached  
97  $5.42 \pm 0.56 \log_{10}$  CFU/footpad (Fig. 2). After 1 week of treatment, all treatment groups receiving  
98 Q203 had markedly reduced footpad swelling compared to R<sub>10</sub>C<sub>100</sub> controls (Fig. 1) (hence forth  
99 drugs are denoted in single letters followed by the dose in mg/kg shown in subscripts). The  
100 swelling grade in the R<sub>10</sub>C<sub>100</sub> group remained unchanged, while mice treated with Q203-  
101 containing regimens, with exception of Q<sub>5</sub> alone, all had medians of  $\leq 1$  (Fig. 1). Similarly, the  
102 CFU counts at week 1 in the R<sub>10</sub>C<sub>100</sub> group were significantly higher than those in all RQ groups  
103 except the Q<sub>10</sub> alone group (Fig. 2A). After 2 weeks of treatment, footpads in all Q203-treated  
104 groups were almost normal compared to the R<sub>10</sub>C<sub>100</sub> group which still had swelling with a  
105 median grade of 2. The corresponding footpad cultures were negative in all R<sub>20</sub>Q<sub>10</sub>-treated mice  
106 and negative in nearly all other Q203-treated groups compared to  $2.63 \pm 0.37 \log_{10}$  CFU in the  
107 R<sub>10</sub>C<sub>100</sub> group (Fig. 2B). The limit of detection was 3 CFU per footpad. After 4 weeks of  
108 treatment, all mice had normal footpads and no CFU were detected in any of the treatment  
109 groups tested. The limit of detection was 1 CFU per footpad. Mean CFU counts are provided in  
110 supplementary Table S1.

111 Relapse: Relapse assessments were made 6 months after treatment completion in mice treated  
112 for 2 or 4 weeks. All mice treated with RIF+Q203 regimens showed no rebound in footpad  
113 swelling during the 6-month follow-up period and the CFU counts were all zero (limit of

114 detection: 1 CFU). In the R<sub>10</sub>C<sub>100</sub> group relapse was assessed only in mice treated for 4 weeks.  
115 Three mice experienced a rebound in footpad swelling during the 6-month follow-up period.  
116 Two of these mice required euthanasia before the planned relapse endpoint because one or both  
117 footpads had deteriorated beyond a lesion index of 3. Overall, the relapse rate in the R<sub>10</sub>C<sub>100</sub>  
118 group was 25%, with 4/16 footpads positive for CFU (p=0.10 vs. other groups with 0/16  
119 relapses).

120

121 *Study 2: To determine the dose-ranging activity of Q203 alone and in combination with standard*  
122 *and high-dose rifampin, including the extended activity after treatment discontinuation.*

123 After showing that Q203 alone at 5-10 mg/kg/day renders mouse footpads culture-negative and  
124 combinations of RIF+Q203 sterilize footpads with just 2 weeks of treatment, we evaluated a  
125 lower dose range and shorter durations of Q203, alone and in combination with RIF. We also  
126 assessed the plasma PK of Q203 after single doses of 0.5, 2 and 10 mg/kg doses, and determined  
127 plasma concentrations of Q203 at 3-4 days and 2 and 4 weeks after stopping treatment.

128 *Pharmacokinetics:* The single dose PK results for Q203 are shown in Fig. 3. Q203 had a t<sub>max</sub> of 2  
129 hrs. C<sub>max</sub> values after 0.5, 2 and 10 mg/kg doses were 0.05, 0.17 and 0.92 µg/ml respectively,  
130 indicating that even at the lowest dose, the C<sub>max</sub> was well above the MIC of 0.000075-0.00015  
131 µg/ml. Plasma AUC values indicated dose-proportional exposures up to 2 mg/kg. After 1 week  
132 of treatment, in the lowest dose group tested, Q203 at 0.5 mg/kg, the mean plasma concentration  
133 of Q203 at 72 hrs post-dose was 0.073 ± 0.024 µg/ml and in the groups treated for 2 weeks, at 96  
134 hrs post-dose, it was 0.052 ± 0.013 µg/ml (Supplementary Table S2). In both these groups, the  
135 concentrations gradually declined during the 4-week follow-up period, but remained higher than  
136 the MIC. With higher doses of Q203, more accumulation was seen, and it increased with the

137 duration of treatment, with plasma concentrations in mice treated for 2 weeks almost twice as  
138 high as in those treated for one week. In mice treated with RIF+Q203, Q203 concentrations were  
139 similar to those in mice treated with Q203 alone indicating no large effect of RIF on Q203  
140 concentrations.

141 *Footpad swelling:* At the start of treatment, mice had a median swelling grade of 2 (Fig. 4). In  
142 untreated mice, the swelling increased to grade 2.5 and grade 3 at end of Weeks 1 and 2,  
143 respectively. All untreated mice required euthanasia at this point. In mice treated with R<sub>10</sub>C<sub>100</sub>,  
144 there was a marginal decrease to 1.5 at Week 1 (Figs. 4A and 4B) and a further decrease to 0.5 at  
145 Week 2 (Fig. 4 C and D). After stopping treatment at 2 weeks, the swelling continued to decrease  
146 gradually during the 4 weeks of follow-up and reverted to baseline (Figs. 4C and D). In mice  
147 treated with RIF 10 mg/kg alone for 1 week, there was slight decline in swelling after peaking at  
148 week 1 (Fig. 4A). At the end of 4 weeks, when all mice were sacrificed for CFU, the median  
149 swelling grade was 1.5, with one mouse showing grade 3 swelling. In mice treated with RIF 10  
150 mg/kg for 2 weeks (Fig. 4C), the response to treatment was better than in mice treated for only 1  
151 week. After 2 weeks of treatment, the swelling had reduced to median swelling grade of 1.5 and  
152 gradually decreased to 0.5 after 4 more weeks of follow-up without treatment. In mice treated  
153 with RIF 20 mg/kg, the response to treatment was similar to that of 10 mg/kg group. As in the  
154 previous experiment, footpad swelling decreased rapidly in Q203-treated groups. All doses of  
155 Q203 whether given alone or in combination with RIF at 10 or 20 mg/kg rapidly reduced footpad  
156 swelling. After 1 week of treatment, the swelling reverted to baseline in most mice, while some  
157 mice showed residual swelling (swelling grade < 1) (Fig. 4A). Irrespective of whether the  
158 treatment was stopped after one week or continued for an additional week, the footpads

159 continued to improve during the follow-up period, with almost all footpads returning to baseline  
160 by Week 2 and remaining free of swelling.

161 Footpad CFU counts: At the start of treatment (D0), mean footpad CFU counts were  $5.40 \pm 0.39$   
162  $\log_{10}$ . They increased to  $5.71 \pm 0.23$  at Week 1 (Figs. 5A and 5B) and  $5.98 \pm 0.23$  at Week 2 in  
163 untreated mice (Figs. 5C and 5D).

164 In mice treated with R<sub>10</sub>C<sub>100</sub>, CFU counts decreased to  $4.79 \pm 0.32 \log_{10}$  at Week 1 and  
165  $3.50 \pm 0.48 \log_{10}$  at Week 2. Continued killing was observed after stopping treatment,  
166 corroborating the observed reductions in footpad swelling during the 4-week follow-up period  
167 (Figs. 5C and 5D). In mice receiving RIF at 10 or 20 mg/kg, little change in CFU was seen after  
168 one week of treatment or during the 4-week follow-up period, again similar to what was seen in  
169 footpad swelling (Figure 5A). Increasing the duration of RIF treatment to two weeks resulted in a  
170  $1.5 \log_{10}$  CFU reduction in both dosage groups (Fig. 5C) and continued decreases to  $1.24 \pm 0.23$   
171 and  $1.78 \pm 0.83$  4 weeks after completing treatment in the R<sub>10</sub> and R<sub>20</sub> groups, respectively.

172 A modest dose-dependent effect was observed in mice treated with Q203 alone for one  
173 week, with CFU counts falling to  $5.03 \pm 0.43$ ,  $3.93 \pm 0.58$ , and  $4.25 \pm 0.42 \log_{10}$  CFU in those  
174 receiving 0.5, 2 and 10 mg/kg doses, respectively. With the exception of R<sub>20</sub>Q<sub>2</sub> (Fig. 5B) ( $p=$   
175  $0.002$ ), the reductions in CFU at Week 1 were not significantly better than the R<sub>10</sub>C<sub>100</sub> control.  
176 However, Q203 treatment for one week resulted in more dramatic reductions in CFU counts after  
177 treatment cessation. CFU counts in Q<sub>0.5</sub>-treated mice fell to  $1.69 \pm 0.64$  and  $0.48 \pm 1.48 \log_{10}$   
178 CFU after 2 and 4 weeks of follow-up. No CFU were detected after 2 or 4 weeks of follow-up in  
179 mice treated with Q<sub>2</sub> or 4 weeks after treatment with Q<sub>10</sub> (Fig. 5A). Comparisons to the R<sub>10</sub>C<sub>100</sub>  
180 group at W1+2 and W1+4 time points was not possible since we did not include these time  
181 points for this group. However, all groups receiving Q203 doses  $\geq 2$  mg/kg had significantly



182 lower CFU counts at the W1+2 ( $p \leq 0.0006$ ) and W1+4 ( $p < 0.0001$ ) time points than R<sub>10</sub>C<sub>100</sub>  
183 controls had at the W2+2 and W2+4 time points, respectively.

184 In mice treated for 2 weeks with Q203, a more prominent dose-response relationship was  
185 observed. In mice treated with Q203 at 10 mg/kg, the mean log<sub>10</sub> CFU count was only  $0.24 \pm$   
186  $0.38$ , with 4/6 pads negative. No CFU were detected in footpads in any Q203-treated group at 2  
187 and 4 weeks follow-up (Fig. 5C). At this point all Q203-containing regimens were significantly  
188 better when compared with the R<sub>10</sub>C<sub>100</sub> controls ( $p \leq 0.05$ ).

189 No benefit of adding RIF at either 10 or 20 mg/kg was seen, as CFU counts were very  
190 similar to those in groups receiving Q203 alone. In fact, addition of RIF may have been slightly  
191 antagonistic at later time points, especially after 2 weeks of treatment and follow-up time points  
192 (Figs. 5B and 5D). Mice in the R<sub>10</sub>Q<sub>2</sub> group received slightly more Q in the first week due to  
193 accidental gavage of mice with 10 mg/kg on Day 4. This group was not treated on Day 5 and  
194 thus received a 16 mg/kg total dose for the weeks as opposed to the intended 10 mg/kg. By the  
195 end of 2 weeks of treatment they had received a 26 mg/kg total dose rather than the intended 20  
196 mg/kg total dose. Mean CFU counts are given in Supplementary Table S3.

197

## 198 **Discussion**

199 The current treatment for BU recommended by WHO (1) is an oral regimen of RIF+CLR  
200 given daily for 8 weeks. This regimen offers advantages over the previously recommended  
201 RIF+STR combination (2). However, it remains problematic because treatment duration  
202 inversely correlates with adherence and patients are often hospitalized until there is clear-cut  
203 evidence of efficacy treatment response, including resolution of any paradoxical reaction (20),  
204 resulting in missed school or work activities. As an extremely potent inhibitor of *M. ulcerans*

205 respiration, Q203 is an exceptional candidate for treatment-shortening regimens. Recently, we  
206 described 3-drug combinations of drugs active on the ETC with and without rifapentine that  
207 appeared capable of shortening the treatment of BU (16). Q203-containing regimens proved to  
208 be most effective and cured all mice after treatment for just 2 weeks. However, none of the  
209 companion drugs in those regimens is currently used in the treatment of BU. Reasoning that RIF  
210 is already a core component of BU treatment regimens, we aimed to test Q203 alone and in  
211 combination with RIF, comprising regimens easier to implement in the clinical setting. Our  
212 results show that regimens of Q203 alone or in combination with RIF are clearly superior to  
213 RIF+CLR and may be capable of reducing the duration of BU treatment to 1-2 weeks.

214 Little information about the PK of Q203 in humans exists in the public domain (18) and  
215 published PK data from mice report very different drug exposures for the same or similar doses  
216 (13, 17). To better understand the dose-response profile of Q203 in mice and the human  
217 equivalent doses of the Q203 doses evaluated in our model, we evaluated Q203 doses ranging  
218 from 0.5 to 10 mg/kg and included PK analyses. Remarkably, Q203 alone at 2 mg/kg rendered  
219 mouse footpads culture-negative after just 5 daily doses. The median plasma  $C_{max}$  and  $AUC_{0-72h}$   
220 values after a single oral dose in mice were 0.17  $\mu\text{g/ml}$  and 4.3  $\mu\text{g-h/ml}$ , respectively. These  
221 results are in line with mouse PK results from Pethe et al (13) and, more importantly, comparable  
222 to the plasma  $C_{max}$  and  $AUC_{0-inf}$  values of 0.38  $\mu\text{g/ml}$  and 6.3  $\mu\text{g-h/ml}$ , respectively, after a single  
223 dose of 100 mg in fed human (18) subjects. Considering that we observed dose-proportional PK  
224 in mice, Q203 doses of 2-10 mg/kg in mice likely correspond well to the daily doses of 100-300  
225 mg that were recently reported to be well tolerated and safe in phase 1 trials and in TB patients  
226 over 14 days of dosing in a recent phase 2a trial (21), provided that the drug is administered with

227 food. Therefore, we predict that these doses can safely shorten treatment of BU to 5 doses or  
228 less.

229         The extreme treatment-shortening effects of Q203 we observed in mice were the result of  
230 persistent killing of *M. ulcerans* that extended well beyond the end of dosing, even at the lowest  
231 dose of 0.5 mg/kg. This persistent killing is likely a function of multiple phenomena:  
232 exceptionally potent activity (e.g., very low MIC), low clearance (e.g., long plasma half-life),  
233 favorable partitioning into tissue (e.g., lung:plasma concentration ratio of 2-3) (13), and a post-  
234 antibiotic effect (e.g., continued antimicrobial effect against *M. ulcerans* after plasma  
235 concentrations fall below MIC). While the roles of the first 2 phenomena are self-evident from  
236 the PK/PD data generated in Study 2, more evidence is needed to confirm the partitioning of  
237 Q203 into mouse footpads and presence of a post-antibiotic effect. Treatment with 0.5 mg/kg for  
238 1-2 weeks resulted in persistent killing for at least 4 weeks beyond the end of dosing. Although  
239 plasma concentrations were approximately 5-10 times higher than MIC at 2 weeks post-  
240 treatment and in the MIC range at 4 weeks post-treatment, Q203 is 99.8% protein bound in  
241 mouse plasma. Therefore, it seems likely that free drug concentrations at the site of infection fell  
242 below MIC during the 4-week follow-up period, thus suggesting the presence of a post-antibiotic  
243 effect. *M. ulcerans* may be especially vulnerable to post-antibiotic effects *in vivo* if drug  
244 treatment shuts down production of the immunosuppressive mycolactone toxin, allowing a more  
245 effective host immune response to develop and enhance bacterial clearance. Indeed, even  
246 RIF+CLR exhibited persistent effects after the end of dosing in Study 2.

247         Another surprising finding of these experiments was that the addition of RIF did not  
248 significantly increase the treatment efficacy of Q203. In fact, other than some additive effects of  
249 RIF with Q203 at 0.5 mg/kg at the Week 1 and Week 2 time points, there were hints of modest

250 antagonistic effects of RIF at each Q203 dose level, especially 2 mg/kg and above. Our PK  
251 results did not show any significant differences in Q203 plasma concentrations when RIF and  
252 Q203 were co-administered when compared to Q203 given alone. These results raise the  
253 prospect of using Q203 as monotherapy, a scenario that may be defensible because the  
254 spontaneous frequency of Q203 resistance mutations in *M. ulcerans* appears to be very low (17)  
255 and *M. ulcerans* is not transmitted from person-to-person, making resistance development both  
256 unlikely to occur as well as unlikely to have any impact beyond the affected individual.

257 In summary, we have demonstrated the extraordinary potential of Q203 to reduce the  
258 duration of treatment for BU to 1 week (or 5 doses of 2-5 mg/kg) in our mouse footpad infection  
259 model. As these doses appear to be a good representation of doses recently tested successfully in  
260 humans, they warrant consideration for further evaluation in clinical trials for BU treatment.  
261 Importantly, we did not define the shortest duration of Q203 treatment needed to eradicate *M.*  
262 *ulcerans* from mouse footpads. Studies evaluating even shorter durations of Q203 with and  
263 without additional companion drugs are underway.

264

## 265 **Methods and Materials**

266 Bacterial strain. *M. ulcerans* strain 1059, originally obtained from a patient in Ghana, was used  
267 for the study (22).

268 Antibiotics. RIF was purchased from Sigma. CLR was purchased from the Johns Hopkins  
269 Hospital pharmacy. Q203 was kindly provided by the Global Alliance for TB Drug  
270 Development. RIF and CLR were prepared in sterile 0.05% (wt/vol) agarose solution in distilled  
271 water. Q203 was formulated in 20% (wt/wt) D- $\alpha$  tocopheryl polyethylene glycol 1000 (Sigma)  
272 succinate solution.

273 Mouse infection. BALB/c mice (Charles River Laboratories) were inoculated subcutaneously in  
274 both hind footpads with 0.03 ml of a culture suspension containing *M. ulcerans* 1059. Treatment  
275 began 6-7 weeks (D0) after infection when the mice had footpad swelling of grade  $\geq 2$ .

276 Treatment. Mice were treated 5 days per week in 0.2 ml by gavage. Drug doses were chosen  
277 based on mean plasma exposures (i.e., similar area under the concentration-time curve over 24  
278 hours post-dose in blood) compared to human doses (7, 16). All animal procedures were  
279 conducted according to relevant national and international guidelines and approved by the Johns  
280 Hopkins University Animal Care and Use Committee.

281 *Study 1.*

282 Mice were randomized to one of the seven treatment groups (Supplemental Table S4). Control  
283 regimens included R<sub>10</sub>C<sub>100</sub>, Q<sub>5</sub> alone or Q<sub>10</sub> alone, where the subscript represents the dose in mg  
284 per kg of body weight. Test regimens consisted of either R<sub>10</sub>Q<sub>5</sub>, R<sub>20</sub>Q<sub>5</sub>, R<sub>10</sub>Q<sub>10</sub> or R<sub>20</sub>Q<sub>10</sub>, and  
285 mice were treated for either 2 or 4 weeks. Mice treated with Q alone were treated for only 2  
286 weeks since they were only included in the experiment to inform the contribution of Q203 and  
287 we did not initially intend to explore the use of Q203 alone as monotherapy. CFU counts were  
288 performed after 1, 2 and 4 weeks of treatment to determine the response to treatment. To  
289 determine the sterilizing activity of each test regimen, mice were held without treatment for six  
290 months after completing 2 and 4 weeks of treatment. Relapse assessment for the R<sub>10</sub>C<sub>100</sub> control  
291 group was done only after 4 weeks of treatment.

292 *Study 2.* Mice were randomized to one of 12 treatment groups, which included Q203 at doses of  
293 0.5, 2 and 10 mg/kg given alone or in combination with RIF at 10 or 20 mg/kg. Control groups  
294 were untreated or received R<sub>10</sub> or R<sub>20</sub> alone, or R<sub>10</sub>C<sub>100</sub>, which is the current standard of care  
295 (Supplemental Table S5). Mice were treated for either 1 or 2 weeks. R<sub>10</sub>Q<sub>2</sub> group mice were

296 accidentally gavaged with Q at 10 mg/kg dose on Day 4 of treatment. These mice were not  
297 gavaged on the following day and therefore received a cumulative dose of 16 mg/kg instead of  
298 the intended 10 mg/kg dose for the first week. By the end of 2 weeks of treatment, these mice  
299 had received a total dose of 26 mg/kg instead of the intended 20 mg/kg dose. Footpad CFU  
300 counts were done at treatment completion and also at 2 and 4 weeks after stopping treatment in  
301 each treatment group to determine the continued bactericidal activity of Q203-containing  
302 regimens.

303 Pharmacokinetics. Intensive PK evaluation was done for groups receiving Q203 alone and in  
304 combination with RIF. After a single dose on D0, small-volume blood samples were collected in  
305 EDTA-containing tubes at 1, 2, 4, 6, 9, 24, 48 and 72 hrs post-dose from the submandibular vein.  
306 To assess the clearance of Q203 after stopping treatment, samples were obtained at 72 hrs after  
307 the final dose in mice treated for 1 week and 96 hrs after the final dose in mice treated for 2  
308 weeks. Blood samples were also obtained at the 2- and 4-week follow time points in mice treated  
309 with Q203 alone for 1 and 2 weeks, and in mice treated with RIF+Q203 for 2 weeks. Samples  
310 from the R<sub>10</sub>Q<sub>2</sub> group were excluded because mice in this group were accidentally gavaged with  
311 10 mg/kg dose on Day 4 of treatment.

312 Evaluation of treatment response. Treatment outcomes were evaluated based on (i) decrease in  
313 footpad swelling, denoted as swelling grade, and (ii) decrease in CFU counts. The swelling grade  
314 was scored as described previously (7). Briefly, the presence and the degree of inflammatory  
315 swelling of the infected footpad were assessed weekly and scored from 0 (no swelling) to 4  
316 (inflammatory swelling extending to the entire limb) for all surviving mice. For CFU counts, six  
317 footpads (from three mice) were evaluated on the day after infection (D-42), and at the start of  
318 treatment (D0) to determine the infectious dose and the pretreatment CFU counts, respectively.

319 The response to treatment was determined by plating 6 footpads (from 3 mice) from each  
320 treatment group at predetermined time points. Footpad tissue was harvested after thorough  
321 disinfection with 70% alcohol swabs and then homogenized by fine mincing before suspending  
322 in sterile phosphate buffered saline (PBS). Ten-fold serial dilutions and undiluted fractions of  
323 homogenate were plated in 0.5 ml aliquots on selective 7H11 agar and incubated at 32°C for up  
324 to 12 weeks before CFU were enumerated. In the second study, homogenates were plated on  
325 7H11 agar supplemented with 10% OADC and 5% bovine plasma albumin to reduce any  
326 potential effects of Q203 carryover due to its long half-life (23).

327 To determine the sterilization activity of each test regimen in Study 1, mice were held for relapse  
328 assessment for 6 months after completing 2 and 4 weeks of treatment. Results were compared to  
329 those from mice treated with R<sub>10</sub>C<sub>100</sub> for 4 weeks. Footpads were inspected every 2 weeks for  
330 any signs of re-swelling after stopping treatment. When re-swelling was observed, mice were  
331 sacrificed when the swelling reached a lesion index  $\geq 3$  and the footpads were harvested and  
332 plated for CFU counts. At the end of the 6-month follow-up period, all remaining mice were  
333 sacrificed and their footpads (16 footpads in each group) were harvested and plated for CFU.  
334 Study 2, instead of relapse assessment at 6 months, we held mice without treatment for an  
335 additional 2 or 4 weeks after treatment completion before harvesting and plating for  
336 determination of CFU counts.

337 Statistical analysis. GraphPad Prism 6 was used to compare mean CFU counts in Q203-  
338 containing groups to the R<sub>10</sub>C<sub>100</sub> control group using two-way analysis of variance with  
339 Bonferroni's post-test to adjust for multiple comparisons. Proportions were compared using  
340 Fisher's Exact test.

341

342

343 **Acknowledgments**

344 This study was supported by the National Institutes of Health (R01-AI113266). We gratefully  
345 acknowledge TB Alliance for providing Q203 and Qurient for quantifying Q203 in mouse  
346 plasma. We thank Dr Kingsley Asiedu for fruitful discussions and encouragement at the  
347 beginning of this study.

348

349

350

351

352

353

354

355

356

357

358



359 **References**

360

361 1. **WHO Technical Advisory Group on Buruli Ulcer.** 2017. Report from the meeting of the  
362 Buruli ulcer Technical Advisory Group. World Health Organization. .

363 2. **Klis, S., Y. Stienstra, R. O. Phillips, K. M. Abass, W. Tuah, and van der Werf, Tjip S.**  
364 2014. Long term streptomycin toxicity in the treatment of Buruli Ulcer: follow-up of participants  
365 in the BURULICO drug trial. *PLoS Negl Trop Dis.* **8**:e2739. doi: 10.1371/journal.pntd.0002739.

366 3. **Dega, H., J. Robert, P. Bonnafous, V. Jarlier, and J. Grosset.** 2000. Activities of several  
367 antimicrobials against *Mycobacterium ulcerans* infection in mice. *Antimicrob. Agents*  
368 *Chemother.* **44**:2367-2372.

369 4. **Bentoucha, A., J. Robert, H. Dega, N. Lounis, V. Jarlier, and J. Grosset.** 2001. Activities  
370 of new macrolides and fluoroquinolones against *Mycobacterium ulcerans* infection in mice.  
371 *Antimicrob. Agents Chemother.* **45**:3109-3112. doi: 10.1128/AAC.45.11.3109-3112.2001.

372 5. **Almeida, D., P. J. Converse, Z. Ahmad, K. E. Dooley, E. L. Nuermberger, and J. H.**  
373 **Grosset.** 2011. Activities of Rifampin, Rifapentine and Clarithromycin Alone and in  
374 Combination against *Mycobacterium ulcerans* Disease in Mice. *PLOS Neglected Tropical*  
375 *Diseases.* **5**:e933. <https://doi.org/10.1371/journal.pntd.0000933>.

376 6. **Tanywe, A., and R. S. Fernandez.** 2017. Effectiveness of rifampicin-streptomycin for  
377 treatment of Buruli ulcer: a systematic review. *JBI Database System Rev. Implement Rep.*  
378 **15**:119-139. doi: 10.11124/JBISRIR-2016-003235 [doi].

379 7. **Almeida, D. V., T. F. Omansen, S. Y. Li, J. Lee, J. H. Grosset, P. J. Converse, and E. L.**  
380 **Nuermberger.** 2019. Oxazolidinones Can Replace Clarithromycin in Combination with  
381 Rifampin in a Mouse Model of Buruli Ulcer. *Antimicrob. Agents Chemother.*  
382 **63**:10.1128/AAC.02171-18. Print 2019 Mar. doi: e02171-18 [pii].

383 8. **Almeida, D., P. J. Converse, Z. Ahmad, K. E. Dooley, E. L. Nuermberger, and J. H.**  
384 **Grosset.** 2011. Activities of Rifampin, Rifapentine and Clarithromycin Alone and in  
385 Combination against *Mycobacterium ulcerans* Disease in Mice. *PLOS Neglected Tropical*  
386 *Diseases.* **5**:e933. <https://doi.org/10.1371/journal.pntd.0000933>.

387 9. **Almeida, D. V., P. J. Converse, S. Li, S. Tyagi, E. L. Nuermberger, and J. H. Grosset.**  
388 2013. Bactericidal activity does not predict sterilizing activity: the case of rifapentine in the  
389 murine model of *Mycobacterium ulcerans* disease. *PLoS Negl Trop Dis.* **7**:e2085. doi:  
390 10.1371/journal.pntd.0002085.

391 10. **Omansen, T. F., D. Almeida, P. J. Converse, S. Y. Li, J. Lee, Y. Stienstra, T. van der**  
392 **Werf, J. H. Grosset, and E. L. Nuermberger.** 2019. High-Dose Rifamycins Enable Shorter

- 393 Oral Treatment in a Murine Model of Mycobacterium ulcerans Disease. *Antimicrob. Agents*  
394 *Chemother.* **63**:10.1128/AAC.01478-18. Print 2019 Feb. doi: e01478-18 [pii].
- 395 11. **Converse, P. J., S. Tyagi, Y. Xing, S. Y. Li, Y. Kishi, J. Adamson, E. L. Nuermberger,**  
396 **and J. H. Grosset.** 2015. Efficacy of Rifampin Plus Clofazimine in a Murine Model of  
397 Mycobacterium ulcerans Disease. *PLoS Negl Trop. Dis.* **9**:e0003823. doi:  
398 10.1371/journal.pntd.0003823 [doi].
- 399 12. **Converse, P. J., D. V. Almeida, R. Tasneen, V. Saini, S. Tyagi, N. C. Ammerman, S. Li,**  
400 **N. M. Anders, M. A. Rudek, J. H. Grosset, and E. L. Nuermberger.** 2018. Shorter-course  
401 treatment for Mycobacterium ulcerans disease with high-dose rifamycins and clofazimine in a  
402 mouse model of Buruli ulcer. *PLoS Negl Trop Dis.* **12**:e0006728. doi:  
403 10.1371/journal.pntd.0006728.
- 404 13. **Pethe, K., P. Bifani, J. Jang, S. Kang, S. Park, S. Ahn, J. Jiricek, J. Jung, H. K. Jeon, J.**  
405 **Cechetto, T. Christophe, H. Lee, M. Kempf, M. Jackson, A. J. Lenaerts, H. Pham, V. Jones,**  
406 **M. J. Seo, Y. M. Kim, M. Seo, J. J. Seo, D. Park, Y. Ko, I. Choi, R. Kim, S. Y. Kim, S. Lim,**  
407 **S. A. Yim, J. Nam, H. Kang, H. Kwon, C. T. Oh, Y. Cho, Y. Jang, J. Kim, A. Chua, B. H.**  
408 **Tan, M. B. Nanjundappa, S. P. Rao, W. S. Barnes, R. Wintjens, J. R. Walker, S. Alonso, S.**  
409 **Lee, J. Kim, S. Oh, T. Oh, U. Nehrbass, S. J. Han, Z. No, J. Lee, P. Brodin, S. N. Cho, K.**  
410 **Nam, and J. Kim.** 2013. Discovery of Q203, a potent clinical candidate for the treatment of  
411 tuberculosis. *Nat. Med.* **19**:1157-1160. doi: 10.1038/nm.3262 [doi].
- 412 14. **Kalia, N. P., B. Shi Lee, N. B. Ab Rahman, G. C. Moraski, M. J. Miller, and K. Pethe.**  
413 2019. Carbon metabolism modulates the efficacy of drugs targeting the cytochrome bc1:aa3 in  
414 Mycobacterium tuberculosis. *Sci. Rep.* **9**:8608-9. doi: 10.1038/s41598-019-44887-9 [doi].
- 415 15. **Stinear, T. P., T. Seemann, S. Pidot, W. Frigui, G. Reysset, T. Garnier, G. Meurice, D.**  
416 **Simon, C. Bouchier, L. Ma, M. Tichit, J. L. Porter, J. Ryan, P. D. Johnson, J. K. Davies, G.**  
417 **A. Jenkin, P. L. Small, L. M. Jones, F. Tekaia, F. Laval, M. Daffe, J. Parkhill, and S. T.**  
418 **Cole.** 2007. Reductive evolution and niche adaptation inferred from the genome of  
419 Mycobacterium ulcerans, the causative agent of Buruli ulcer. *Genome Res.* **17**:192-200. doi:  
420 gr.5942807 [pii].
- 421 16. **Converse, P. J., D. V. Almeida, S. Tyagi, J. Xu, and E. L. Nuermberger.** 2019.  
422 Shortening Buruli Ulcer Treatment with Combination Therapy Targeting the Respiratory Chain  
423 and Exploiting Mycobacterium ulcerans Gene Decay. *Antimicrob. Agents Chemother.*  
424 **63**:10.1128/AAC.00426-19. Print 2019 Jul. doi: e00426-19 [pii].
- 425 17. **Scherr, N., R. Bieri, S. S. Thomas, A. Chauffour, N. P. Kalia, P. Schneide, M. T. Ruf, A.**  
426 **Lamelas, M. S. S. Manimekalai, G. Gruber, N. Ishii, K. Suzuki, M. Tanner, G. C. Moraski,**  
427 **M. J. Miller, M. Witschel, V. Jarlier, G. Pluschke, and K. Pethe.** 2018. Targeting the  
428 Mycobacterium ulcerans cytochrome bc1:aa3 for the treatment of Buruli ulcer. *Nat. Commun.*  
429 **9**:5370-8. doi: 10.1038/s41467-018-07804-8 [doi].

- 430 18. **Kim, J.** 2017. Q203 update. Presentation at the Critical PAtH to Tuberculosis Regimens  
431 (CPTR) workshop, Bethesda, MD-USA, 2017. [http://www.cptrinitiative.org/wp-](http://www.cptrinitiative.org/wp-content/uploads/2017/05/21_06_Kim.pdf)  
432 [content/uploads/2017/05/21\\_06\\_Kim.pdf](http://www.cptrinitiative.org/wp-content/uploads/2017/05/21_06_Kim.pdf).
- 433 19. **Dega, H., A. Bentoucha, J. Robert, V. Jarlier, and J. Grosset.** 2002. Bactericidal activity  
434 of rifampin-amikacin against *Mycobacterium ulcerans* in mice. *Antimicrob. Agents Chemother.*  
435 **46**:3193-3196.
- 436 20. **Frimpong, M., B. Agbavor, M. S. Duah, A. Loglo, F. N. Sarpong, J. Boakye-Appiah, K.**  
437 **M. Abass, M. Dongyele, G. Amofa, W. Tuah, M. Frempong, Y. A. Amoako, M.**  
438 **Wansbrough-Jones, and R. O. Phillips.** 2019. Paradoxical reactions in Buruli ulcer after  
439 initiation of antibiotic therapy: Relationship to bacterial load. *PLoS Negl Trop. Dis.*  
440 **13**:e0007689. doi: 10.1371/journal.pntd.0007689 [doi].
- 441 21. **Quriient.** 2019. Quriient Announces Positive Phase 2a Data of Novel Antibiotic for the  
442 Treatment of Tuberculosis. *Business Wire.* .  
443 <https://www.businesswire.com/news/home/20190603005166/en/>.
- 444 22. **Williamson, H. R., M. E. Benbow, K. D. Nguyen, D. C. Beachboard, R. K.**  
445 **Kimbirauskas, M. D. McIntosh, C. Quaye, E. O. Ampadu, D. Boakye, R. W. Merritt, and**  
446 **P. L. Small.** 2008. Distribution of *Mycobacterium ulcerans* in buruli ulcer endemic and non-  
447 endemic aquatic sites in Ghana. *PLoS Negl Trop. Dis.* **2**:e205. doi:  
448 10.1371/journal.pntd.0000205 [doi].
- 449 23. **Lounis, N., T. Gevers, J. Van Den Berg, T. Verhaeghe, R. van Heeswijk, and K.**  
450 **Andries.** 2008. Prevention of drug carryover effects in studies assessing antimycobacterial  
451 efficacy of TMC207. *J. Clin. Microbiol.* **46**:2212-2215. doi: 10.1128/JCM.00177-08 [doi].
- 452  
453  
454  
455  
456  
457  
458  
459  
460  
461  
462  
463  
464  
465  
466  
467  
468  
469

470  
471  
472  
473  
474  
475  
476  
477

478 **Figure legends**

479 **Fig 1. Footpad swelling grade of infected mouse footpads in response to treatment in Study**

480 **1:** Treatment was initiated 6 weeks after infection, when swelling approached swelling grade 2.5.  
481 Swelling grade 0 corresponds to no clinically visible pathology, grade 1 infers redness of the  
482 footpad, grade 2 edematous swelling of the footpad, and grade 3 ascending swelling of the leg  
483 and impeding necrosis. Data points represent medians per treatment group. Data were  
484 normalized to day 0 (beginning of treatment) by subtracting from the median swelling grade of  
485 all mice at D0 and assuming the total median as group mean for that time point. All Q-containing  
486 regimens rapidly reduced swelling grade compared with R<sub>10</sub>C<sub>100</sub> controls. By the end of 1 week  
487 of treatment, all Q-containing regimens, except the lowest dose of Q, 5 mg/kg, had reduced the  
488 swelling to below grade 1, while no change was seen in the RC treatment controls. By the end of  
489 2 weeks in all mice treated with Q-containing regimens had only residual swelling left, median  
490 swelling grade was 0.25. Numbers in subscripts after drugs indicate doses in mg/kg. D, day; R,  
491 rifampin; C, clarithromycin; Q, Q203/Telacebec.

492

493 **Fig 2. Microbiological outcome in Study 1:** Mice were infected with  $2.71 \pm 0.93 \log_{10}$  CFU/  
494 footpad of *M. ulcerans* into both hind footpads. After 6 weeks of incubation, treatment was  
495 initiated (D0). At this time point, the CFU mean ( $\pm$ SD) equaled 5.42 ( $\pm$ 0.56). Groups of mice  
496 were sacrificed at week 1, week 2 and week 4 and footpads (n= 6) were dissected, minced, and  
497 plated on 7H11 selective agar for colony counting and CFU analysis. For statistical analysis all

498 test regimens were compared to R<sub>10</sub>C<sub>100</sub> controls. (A) After 1 week of treatment all Q-containing  
499 regimens, except Q<sub>10</sub> given alone, were significantly better than controls, with R<sub>10</sub>Q<sub>10</sub> ( $p <$   
500 0.0001) and R<sub>20</sub>Q<sub>10</sub> ( $p < 0.001$ ) showing the best activity. (B) At week 2, most footpads in mice  
501 treated with Q-containing regimens were culture negative and significantly better than R<sub>10</sub>C<sub>100</sub> ( $p$   
502  $\leq 0.0008$ ). At week 4, none of the mice in the combination treatment groups, including R<sub>10</sub>C<sub>100</sub>  
503 controls, were culture-positive (data not shown). Monotherapy regimens were not tested at this  
504 timepoint. Numbers in subscript after drugs indicate doses in mg/kg. D, day; UT, untreated; R,  
505 rifampin; C, clarithromycin; Q, Q203/Telacebec; NT, Not tested. Dashed line indicates the pre-  
506 treatment CFU at D0. Horizontal lines indicate median values.

507

508 **Fig 3. Single dose pk for Q203:** Mice were dosed with either 0.5 mg/kg (green circle), 2 mg/kg  
509 (red squares) or 10 mg/kg (blue triangles) dose of Q203 and the blood collected for serum  
510 concentrations at the indicated timepoints. Median PK parameters shown in the inset indicate  
511 dose-proportional exposures.

512

513 **Fig 4. Footpad swelling grade of infected mouse footpads in response to treatment in Study**  
514 **2:** Treatment was initiated 6 weeks after infection, when median swelling grade approached 2.  
515 Data points represent medians per treatment group. Swelling results in mice treated for 1 week  
516 are shown in panels A and B and those for mice treated for 2 weeks are shown in panels C and  
517 D. Monotherapy groups are shown in panels A and C while combination treatment groups are  
518 shown in panels B and D. R<sub>10</sub>C<sub>100</sub> is the standard treatment control. Solid lines represent change  
519 in footpad swelling during treatment, while that after stopping treatment is shown by dashed line.  
520 All Q-containing regimens reduced footpad swelling after just 1 week of treatment, and

521 continued to show response after stopping treatment. Most footpads were at baseline levels after  
522 2-3 weeks. R alone produced a slight decline in swelling after peaking at 1 week. The footpads  
523 never reached a median grade of 1 after 4 weeks follow-up. As with 1 week of treatment, 2  
524 weeks of Q-containing regimens rapidly rendered footpads swelling-free. In comparison, the RC-  
525 treated controls showed gradual decreases in footpad swelling. Numbers in subscripts after drugs  
526 indicate doses in mg/kg. D, day; UT, untreated; R, rifampin; C, clarithromycin; Q,  
527 Q203/Telacebec,

528

529 **Fig 5. Microbiological outcome in Study 2:** Panels A and B show the response to treatment for  
530 1 week, and panels C and D show the response to treatment for 2 weeks. Panels A and C show  
531 results for monotherapy, and panels B and D show combination treatment groups. Solid lines  
532 indicate fall in mean CFU ( $\pm$ SEM) during treatment and dashed line shows reduction after  
533 stopping treatment. . After 1 week of treatment, Q-containing regimens showed a marked dose  
534 response, and although CFU counts at Week 1 were not significantly different than RC controls,  
535 more dramatic reductions occurred during the 4 week follow-up period after stopping treatment.  
536 All Q-containing regimens except Q<sub>0.5</sub> were significantly better after 1 week of treatment than  
537 RC treatment for 2 weeks. After 2 weeks of treatment, all Q-containing regimens were  
538 significantly better than RC control after 2 weeks and rendered footpads negative at follow-up 2  
539 weeks after stopping treatment.

540

541

542

543

544 **Fig S1. Individual mouse CFU data from Study 2:** At the start of treatment (D0) the  
545  $\log_{10}$ CFU/footpad was  $5.4 \pm 0.39$ . R<sub>10</sub>C<sub>100</sub> was the standard treatment control. Top panels show

546 CFU counts in mice treated for 1 week, while bottom panels show CFU counts in mice treated  
547 for 2 weeks. (A) After 1 week of treatment, there was not much reduction in CFU in R<sub>10</sub>, R<sub>20</sub> and  
548 R<sub>10</sub>C<sub>100</sub> controls. Q-treated groups had marginally lower CFUs that were not significantly  
549 different from controls, except for R<sub>20</sub>Q<sub>2</sub> (P = 0.002). (B) At follow-up 2 weeks after stopping  
550 treatment (Week 1+2), CFU counts continued to decrease in Q-containing arms. (C) At follow-  
551 up 4 weeks after stopping treatment, all mice treated with Q-containing regimens, except those  
552 treated with Q at 0.5 mg/kg, were culture-negative. (D) After 2 weeks of treatment, all Q-  
553 containing regimens were significantly better than R<sub>10</sub>C<sub>100</sub> control. (E and F) CFU counts  
554 continued to decrease at follow-up 2 and 4 weeks after stopping treatment, with all Q-containing  
555 regimens rendering footpads culture-negative.

556

557 **Fig 1.**

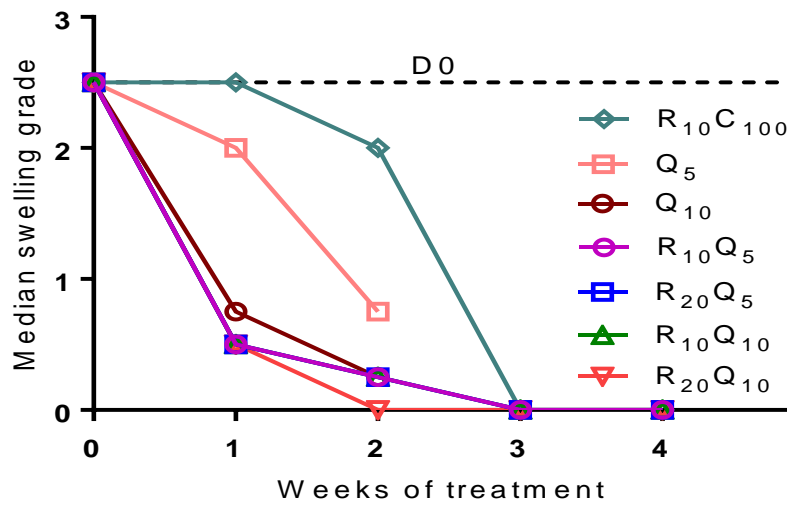

558  
559  
560  
561  
562  
563  
564  
565  
566  
567  
568  
569  
570  
571  
572  
573  
574  
575  
576  
577  
578  
579  
580  
581  
582  
583  
584  
585  
586  
587  
588



589  
590  
591  
592

**Fig 2.**

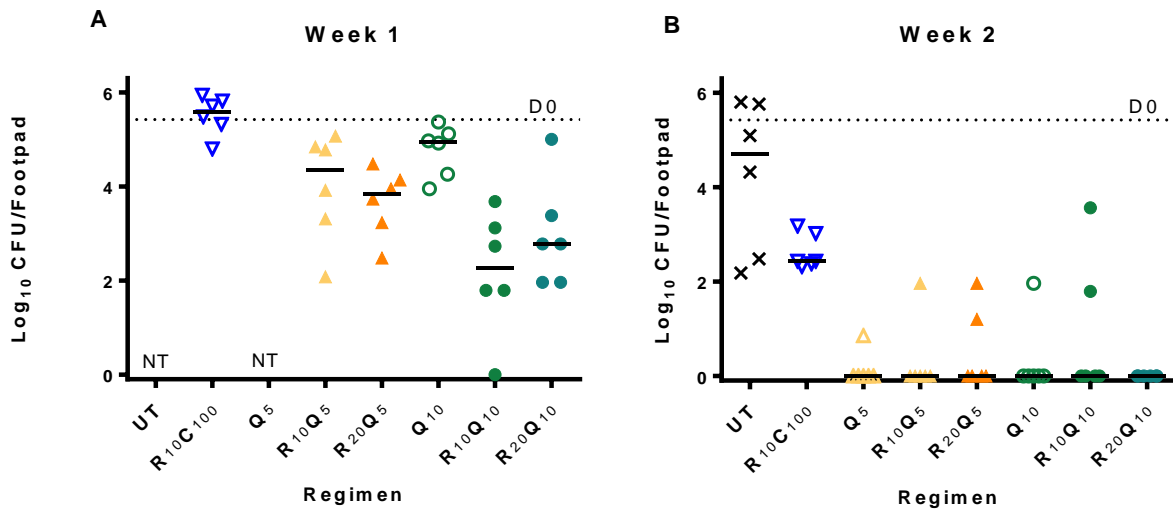

593  
594

595 **Fig 3.**

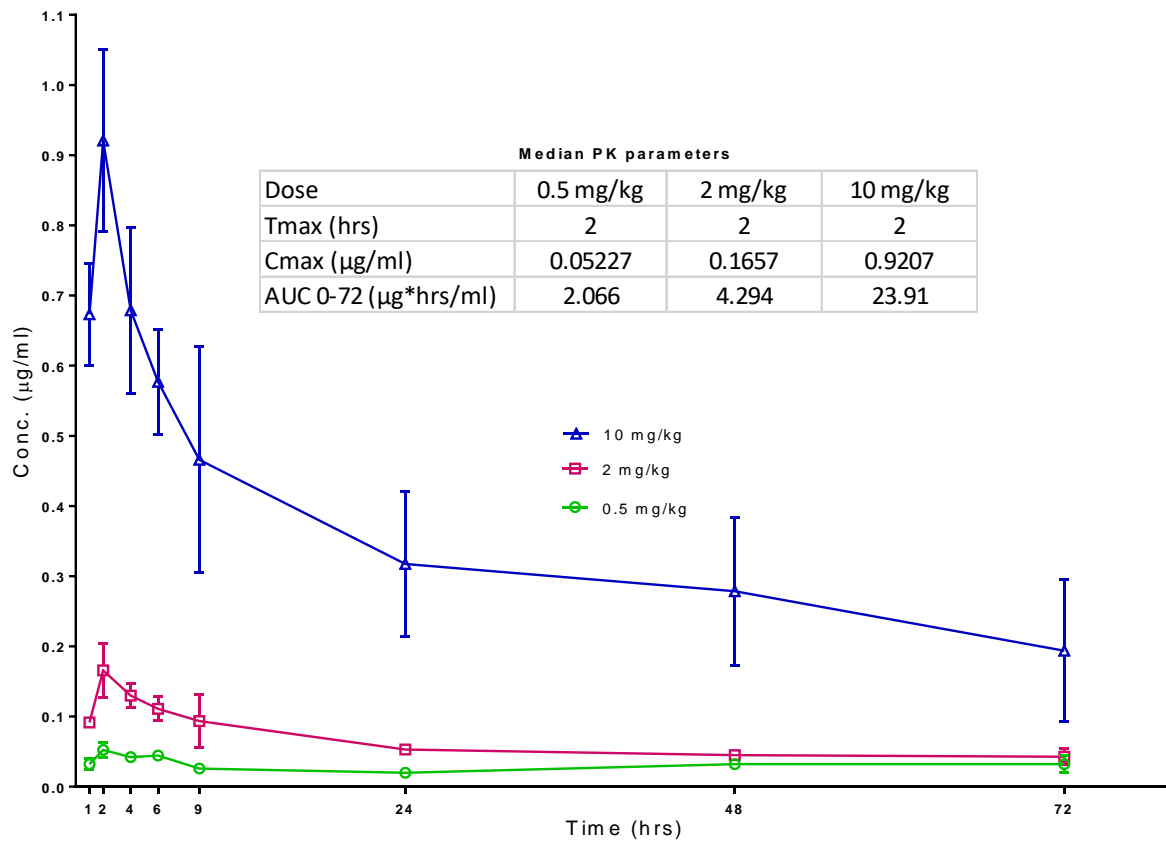

596  
597  
598  
599  
600  
601  
602  
603  
604  
605  
606  
607  
608  
609  
610  
611  
612  
613  
614  
615

616  
617  
618  
619

**Fig 4.**

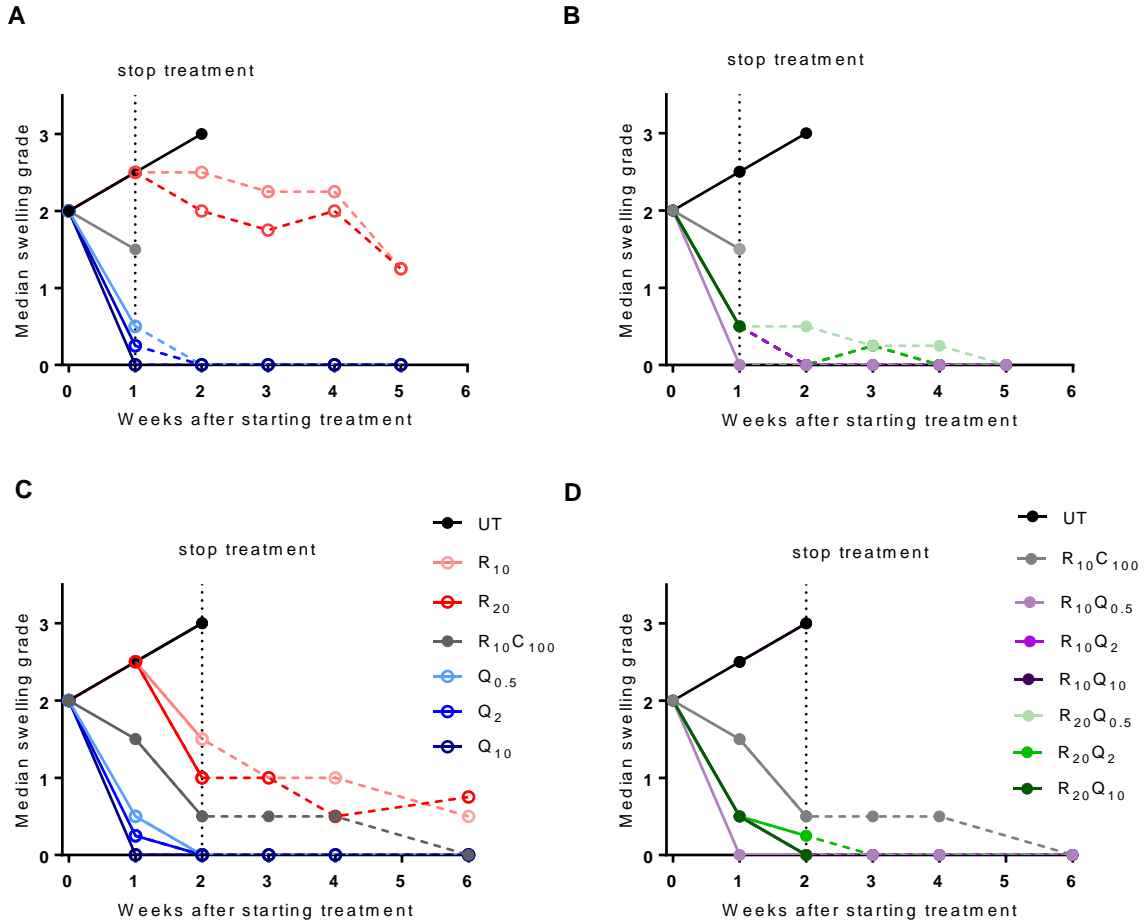

620  
621  
622  
623  
624  
625  
626  
627  
628  
629  
630  
631  
632  
633  
634  
635

636 **Fig 5.**

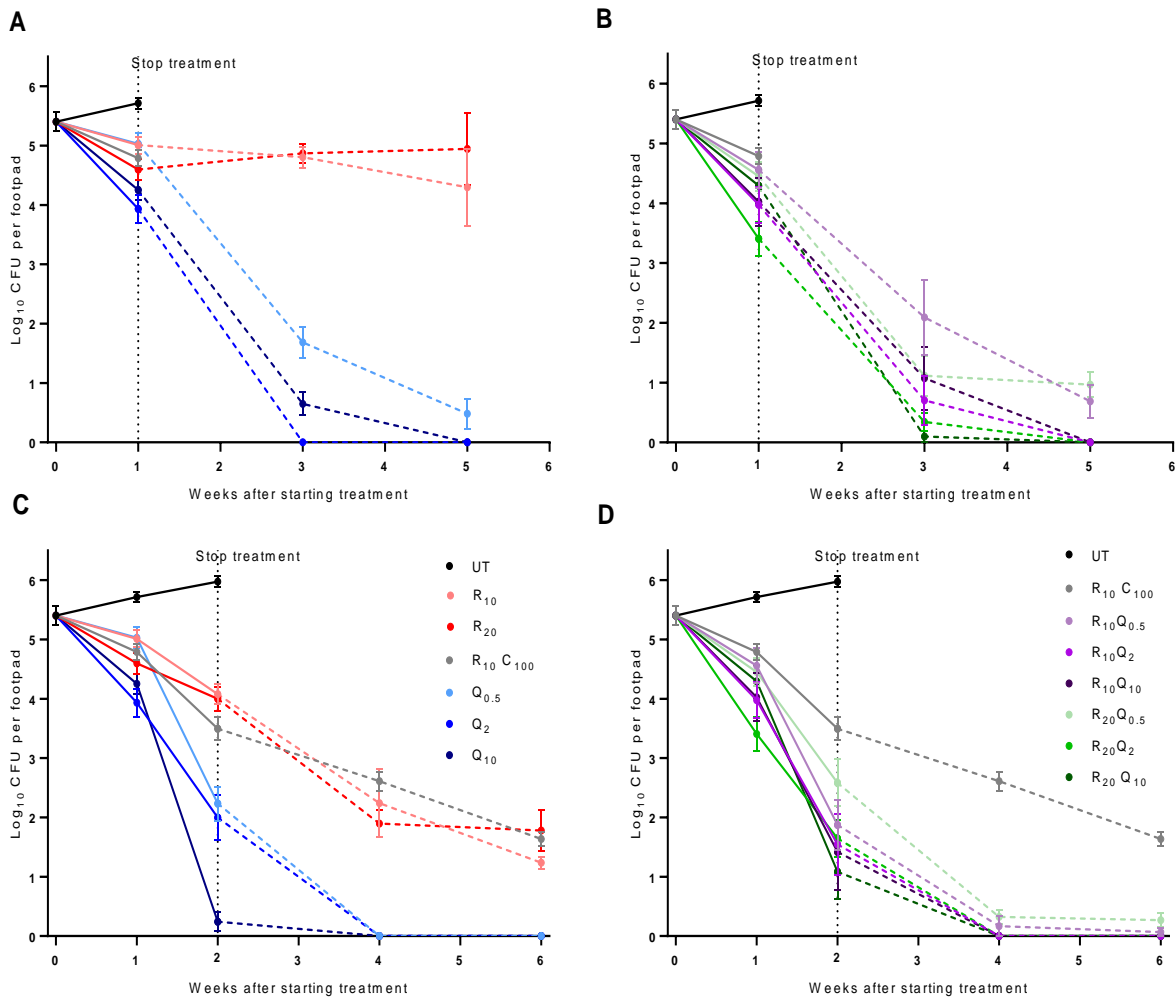

637  
638  
639  
640  
641  
642  
643  
644  
645  
646  
647  
648  
649  
650  
651  
652  
653



655 **Supplementary Data**

656

657 Fig S1.

658

659

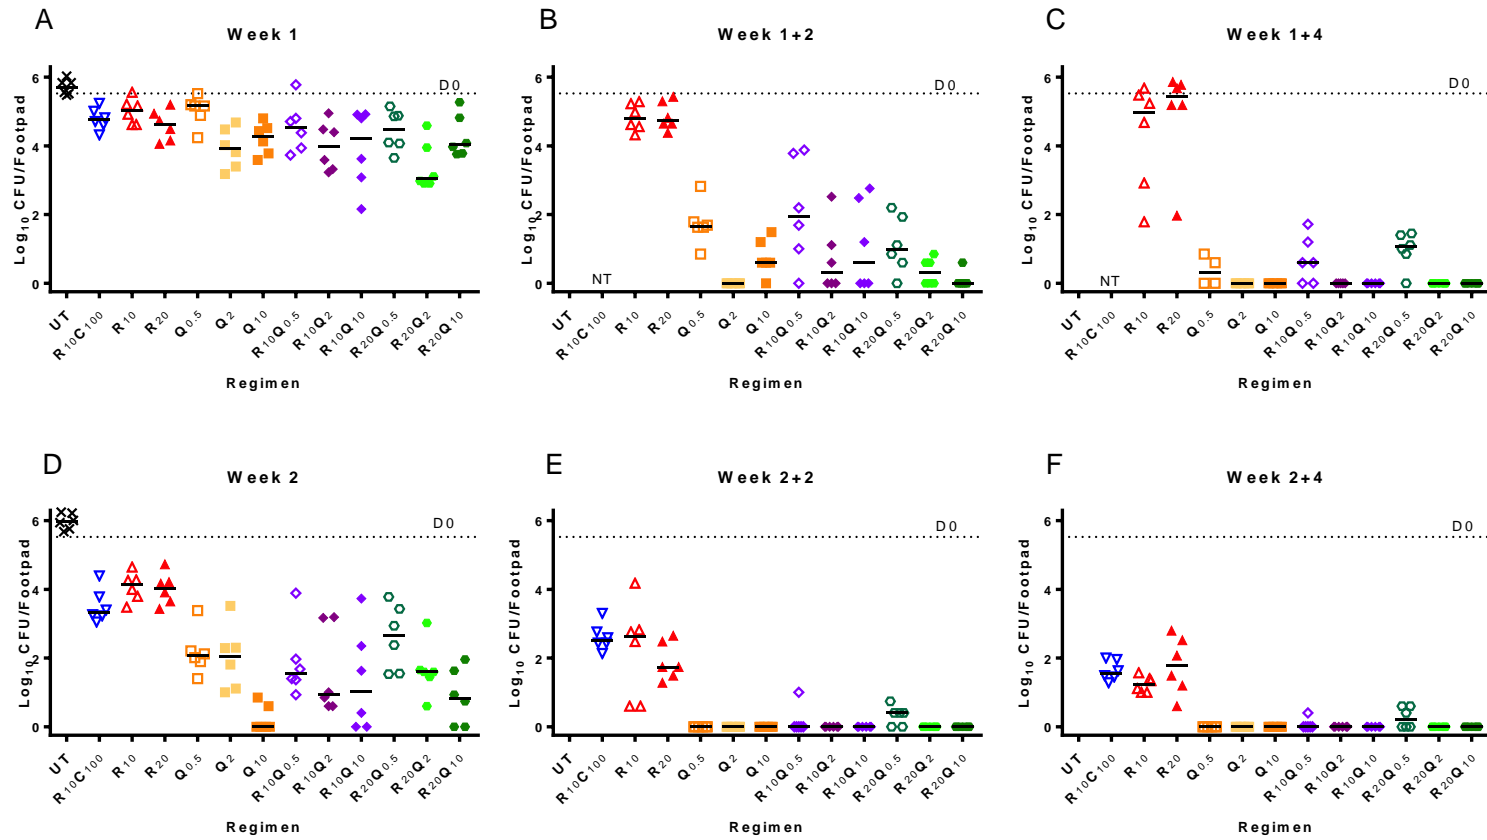

660

661

662

663 Table S1: Change in footpad CFU in Study 1: *To determine the sterilizing efficacy of combining Q203 with standard and high doses of*  
 664 *rifampin.*  
 665

| Regimen                          | Mean ( $\pm$ SD) CFU count |                 |                 |                              |        | Proportion of footpads with positive culture |              |
|----------------------------------|----------------------------|-----------------|-----------------|------------------------------|--------|----------------------------------------------|--------------|
|                                  | D-40                       | D0              | Week 1          | Week 2                       | Week 4 | Week 2 (+24)                                 | Week 4 (+24) |
| <u>Controls</u>                  |                            |                 |                 |                              |        |                                              |              |
| Untreated                        | 2.71 $\pm$ 0.93            | 5.42 $\pm$ 0.56 |                 | 5.24 $\pm$ 0.69              |        |                                              |              |
| R <sub>10</sub> C <sub>100</sub> |                            |                 | 5.51 $\pm$ 0.41 | 2.63 $\pm$ 0.37              | 0      | NT                                           | 4/16         |
| Q <sub>5</sub>                   |                            |                 | NT              | 0.14 $\pm$ 0.35 <sup>1</sup> | NT     |                                              |              |
| Q <sub>10</sub>                  |                            |                 | 4.77 $\pm$ 0.54 | 0.33 $\pm$ 0.80 <sup>1</sup> | NT     |                                              |              |
| <u>Tests</u>                     |                            |                 |                 |                              |        |                                              |              |
| R <sub>10</sub> Q <sub>5</sub>   |                            |                 | 4.00 $\pm$ 1.15 | 0.33 $\pm$ 0.80 <sup>1</sup> | 0      | 0/16                                         | 0/16         |
| R <sub>20</sub> Q <sub>5</sub>   |                            |                 | 3.67 $\pm$ 0.72 | 0.53 $\pm$ 0.85 <sup>2</sup> | 0      | 0/16                                         | 0/16         |
| R <sub>10</sub> Q <sub>10</sub>  |                            |                 | 2.18 $\pm$ 1.30 | 0.89 $\pm$ 1.49 <sup>2</sup> | 0      | 0/16                                         | 0/16         |
| R <sub>20</sub> Q <sub>10</sub>  |                            |                 | 2.98 $\pm$ 1.13 | 0                            | 0      | 0/16                                         | 0/16         |

666 <sup>1</sup> 5/6 pads negative

667 <sup>2</sup> 4/6 pads negative

668

669 Day after infection is D-40, D0 is the start of treatment. Relapse was assessed 24 weeks after completing 2 weeks (2+24) and 4 weeks  
 670 (4+24) of treatment. Drug abbreviations: R, Rifampin; C, Clarithromycin; Q, Q203/Telacebec. Drug dose is indicated by the number  
 671 in subscript following the drug abbreviation. NT, not tested.

672

673

674

675

676

677

678

679

680 Table S2: Change in Q203 plasma concentration after stopping treatment

681

| Treatment and duration                                                                                     | Mean ( $\pm$ SD) plasma concentration (in $\mu\text{g/ml}$ ) at the indicated time after the last dose |                   |                    |
|------------------------------------------------------------------------------------------------------------|--------------------------------------------------------------------------------------------------------|-------------------|--------------------|
|                                                                                                            | 2-3 days*                                                                                              | 2 weeks           | 4 weeks            |
| Q <sub>0.5</sub> - 1 week                                                                                  | 0.073 $\pm$ 0.024                                                                                      | 0.008 $\pm$ 0.003 | 0.001 $\pm$ 0.001  |
| Q <sub>2</sub> - 1 week                                                                                    | 0.104 $\pm$ 0.034                                                                                      | 0.017 $\pm$ 0.005 | 0.004 $\pm$ 0.0002 |
| Q <sub>10</sub> - 1 week                                                                                   | 0.484 $\pm$ 0.100                                                                                      | 0.095 $\pm$ 0.023 | 0.112 $\pm$ 0.087  |
| Q <sub>0.5</sub> - 2 weeks                                                                                 | 0.052 $\pm$ 0.013                                                                                      | 0.008 $\pm$ 0.002 | 0.002 $\pm$ 0.001  |
| Q <sub>2</sub> - 2 weeks                                                                                   | 0.214 $\pm$ 0.084                                                                                      | 0.044 $\pm$ 0.029 | 0.005 $\pm$ 0.002  |
| Q <sub>10</sub> - 2 weeks                                                                                  | 0.794 $\pm$ 0.100                                                                                      | 0.083 $\pm$ 0.023 | 0.021 $\pm$ 0.087  |
| R <sub>10</sub> Q <sub>10</sub> - 2 weeks                                                                  | 0.713 $\pm$ 0.052                                                                                      | 0.226 $\pm$ 0.109 | 0.020 $\pm$ 0.014  |
| R <sub>20</sub> Q <sub>2</sub> - 2 weeks                                                                   | 0.204 $\pm$ 0.036                                                                                      | 0.023 $\pm$ 0.008 | 0.004 $\pm$ 0.001  |
| R <sub>20</sub> Q <sub>10</sub> - 2 weeks                                                                  | 0.769 $\pm$ 0.262                                                                                      | 0.109 $\pm$ 0.060 | 0.011 $\pm$ 0.002  |
| *blood draw was 2 days and 3 days after stopping treatment in mice treated for 1 and 2 weeks, respectively |                                                                                                        |                   |                    |

682

683 Drug abbreviations: R, Rifampin; C, Clarithromycin; Q, Q203/Telacebec. Drug dose is indicated by the number in subscript following  
684 the drug abbreviation.

685

686



687 Table S3: Change in footpad CFU in study 2: *To determine the dose-ranging activity of Q203 alone and in combination with standard*  
 688 *and high dose rifampin, including the extended activity after treatment discontinuation*  
 689

| Regimen                          | Mean ( $\pm$ SD) CFU count during treatment |                |                 |                              | Mean ( $\pm$ SD) CFU count after stopping treatment |                              |                              |                              |
|----------------------------------|---------------------------------------------|----------------|-----------------|------------------------------|-----------------------------------------------------|------------------------------|------------------------------|------------------------------|
|                                  | D-45                                        | D0             | Week 1          | Week 2                       | Week 1 (+2)                                         | Week 1 (+4)                  | Week 2 (+2)                  | Week 2 (+4)                  |
| Untreated                        | 2.61 $\pm$ 0.21                             | 5.4 $\pm$ 0.39 | 5.71 $\pm$ 0.23 | 5.98 $\pm$ 0.23              | -                                                   | -                            | -                            | -                            |
| RC                               |                                             |                | 4.79 $\pm$ 0.32 | 3.50 $\pm$ 0.48              | -                                                   | -                            | 2.61 $\pm$ 0.40              | 1.63 $\pm$ 0.29              |
| Q <sub>0.5</sub>                 |                                             |                | 5.03 $\pm$ 0.43 | 2.24 $\pm$ 0.71              | 1.69 $\pm$ 0.64                                     | 0.48 $\pm$ 1.48 <sup>6</sup> | 0                            | 0                            |
| Q <sub>2</sub>                   |                                             |                | 3.93 $\pm$ 0.58 | 2.00 $\pm$ 0.93              | 0                                                   | 0                            | 0                            | 0                            |
| Q <sub>10</sub>                  |                                             |                | 4.25 $\pm$ 0.42 | 0.24 $\pm$ 0.38 <sup>1</sup> | 0.65 $\pm$ 0.48 <sup>3</sup>                        | 0                            | 0                            | 0                            |
| R <sub>10</sub>                  |                                             |                | 5.01 $\pm$ 0.35 | 4.08 $\pm$ 0.41              | 4.81 $\pm$ 0.44                                     | 4.30 $\pm$ 1.58              | 2.24 $\pm$ 1.40              | 1.24 $\pm$ 0.23              |
| R <sub>20</sub>                  |                                             |                | 4.60 $\pm$ 0.45 | 4.00 $\pm$ 0.49              | 4.87 $\pm$ 0.41                                     | 4.95 $\pm$ 1.48              | 1.90 $\pm$ 0.55              | 1.78 $\pm$ 0.83              |
| R <sub>10</sub> Q <sub>0.5</sub> |                                             |                | 4.56 $\pm$ 0.73 | 1.87 $\pm$ 1.05              | 2.09 $\pm$ 1.53 <sup>3</sup>                        | 0.69 $\pm$ 0.68 <sup>2</sup> | 0.17 $\pm$ 0.41 <sup>5</sup> | 0.07 $\pm$ 0.16 <sup>5</sup> |
| R <sub>10</sub> Q <sub>2</sub>   |                                             |                | 3.98 $\pm$ 0.73 | 1.55 $\pm$ 1.27              | 0.71 $\pm$ 1.00 <sup>4</sup>                        | 0                            | 0                            | 0                            |
| R <sub>10</sub> Q <sub>10</sub>  |                                             |                | 4.03 $\pm$ 0.99 | 1.42 $\pm$ 1.57 <sup>2</sup> | 1.07 $\pm$ 1.29 <sup>4</sup>                        | 0                            | 0                            | 0                            |
| R <sub>20</sub> Q <sub>0.5</sub> |                                             |                | 4.45 $\pm$ 0.59 | 2.58 $\pm$ 0.97              | 1.11 $\pm$ 0.83 <sup>3</sup>                        | 0.97 $\pm$ 0.53 <sup>3</sup> | 0.32 $\pm$ 0.28 <sup>2</sup> | 0.27 $\pm$ 0.30 <sup>4</sup> |

690 <sup>1</sup>1/6 pads negative

691 <sup>2</sup>2/6 pads negative

692 <sup>3</sup>1/6 pads negative

693 <sup>4</sup>3/6 pads negative

694 <sup>5</sup>5/6 pads negative

695 <sup>6</sup>CFU count from 3 footpads only, as 3 others were contaminated

696 Day after infection is D-45. D0 is the start of treatment. Treatment duration is given in weeks and the numbers in parentheses indicate  
 697 the number of weeks after stopping treatment. Drug abbreviations: R, Rifampin; C, Clarithromycin; Q, Q203/Telacebec. Drugdose is  
 698 indicated by the number in subscript following the drug abbreviation.

699

700

701

702

703 Table S4: Experimental scheme for Study 1

704  
705

| Regimen                            | Time points for footpad CFU counts |              |                |                |                | Relapse assessment after stopping treatment |                | Total      |
|------------------------------------|------------------------------------|--------------|----------------|----------------|----------------|---------------------------------------------|----------------|------------|
|                                    | D-42                               | D 0          | Week 1         | Week 2         | Week 4         | Week 2 (+24)                                | Week 4 (+24)   |            |
| <u>Controls</u>                    |                                    |              |                |                |                |                                             |                |            |
| Untreated                          | 3 (6)                              | 3 (6)        |                | 3 (6)          |                |                                             |                | 9          |
| R <sub>10</sub> CLR <sub>100</sub> |                                    |              | 3 (6)          | 3 (6)          | 3 (6)          |                                             | 8 (16)         | 17         |
| Q <sub>5</sub>                     |                                    |              |                | 3 (6)          |                |                                             |                | 3          |
| Q <sub>10</sub>                    |                                    |              | 3 (6)          | 3 (6)          |                |                                             |                | 6          |
| <u>Tests</u>                       |                                    |              |                |                |                |                                             |                |            |
| R <sub>10</sub> Q <sub>5</sub>     |                                    |              | 3 (6)          | 3 (6)          | 3 (6)          | 8 (16)                                      | 8 (16)         | 25         |
| R <sub>20</sub> Q <sub>5</sub>     |                                    |              | 3 (6)          | 3 (6)          | 3 (6)          | 8 (16)                                      | 8 (16)         | 25         |
| R <sub>10</sub> Q <sub>10</sub>    |                                    |              | 3 (6)          | 3 (6)          | 3 (6)          | 8 (16)                                      | 8 (16)         | 25         |
| R <sub>20</sub> Q <sub>10</sub>    |                                    |              | 3 (6)          | 3 (6)          | 3 (6)          | 8 (16)                                      | 8 (16)         | 25         |
| <b>Total</b>                       | <b>3 (6)</b>                       | <b>3 (6)</b> | <b>18 (36)</b> | <b>24 (48)</b> | <b>15 (30)</b> | <b>32 (64)</b>                              | <b>40 (80)</b> | <b>135</b> |

706

707 A total of 135 mice were infected in both hind footpads. At each time point for footpad CFU counts, 3 mice (6 footpads) were  
708 harvested. Relapse assessments were done 24 weeks after stopping treatment for 2 or 4 weeks. Drug abbreviations: R, Rifampin; C,  
709 Clarithromycin; Q, Q203/Telacebec. Drug dose is indicated by the number in subscript following the drug abbreviation.

710

711

712

713

714

715

716

717  
718 Table S5: Experimental scheme for Study 2.  
719

| Regimen                          | Time points for footpad CFU counts during treatment |    |         |         | Time points for CFU counts after stopping treatment |             |             |             | 720        |
|----------------------------------|-----------------------------------------------------|----|---------|---------|-----------------------------------------------------|-------------|-------------|-------------|------------|
|                                  | D-45                                                | D0 | Week 1  | Week 2  | Week 1 (+2)                                         | Week 1 (+4) | Week 2 (+2) | Week 2 (+4) | Total mice |
| Untreated                        | 3                                                   | 3  | 3 (6)   | 3 (6)   |                                                     |             |             |             | 12         |
| R <sub>10</sub> C <sub>100</sub> |                                                     |    | 3 (6)   | 3 (6)   |                                                     |             | 3 (6)       | 3 (6)       | 12         |
| Q <sub>0.5</sub>                 |                                                     |    | 3 (6)   | 3 (6)   | 3 (6)                                               | 3 (6)       | 3 (6)       | 3 (6)       | 18         |
| Q <sub>2</sub>                   |                                                     |    | 3 (6)   | 3 (6)   | 3 (6)                                               | 3 (6)       | 3 (6)       | 3 (6)       | 18         |
| Q <sub>10</sub>                  |                                                     |    | 3 (6)   | 3 (6)   | 3 (6)                                               | 3 (6)       | 3 (6)       | 3 (6)       | 18         |
| R <sub>10</sub>                  |                                                     |    | 3 (6)   | 3 (6)   | 3 (6)                                               | 3 (6)       | 3 (6)       | 3 (6)       | 18         |
| R <sub>20</sub>                  |                                                     |    | 3 (6)   | 3 (6)   | 3 (6)                                               | 3 (6)       | 3 (6)       | 3 (6)       | 18         |
| R <sub>10</sub> Q <sub>0.5</sub> |                                                     |    | 3 (6)   | 3 (6)   | 3 (6)                                               | 3 (6)       | 3 (6)       | 3 (6)       | 18         |
| R <sub>10</sub> Q <sub>2</sub>   |                                                     |    | 3 (6)   | 3 (6)   | 3 (6)                                               | 3 (6)       | 3 (6)       | 3 (6)       | 18         |
| R <sub>10</sub> Q <sub>10</sub>  |                                                     |    | 3 (6)   | 3 (6)   | 3 (6)                                               | 3 (6)       | 3 (6)       | 3 (6)       | 18         |
| R <sub>20</sub> Q <sub>0.5</sub> |                                                     |    | 3 (6)   | 3 (6)   | 3 (6)                                               | 3 (6)       | 3 (6)       | 3 (6)       | 18         |
| R <sub>20</sub> Q <sub>2</sub>   |                                                     |    | 3 (6)   | 3 (6)   | 3 (6)                                               | 3 (6)       | 3 (6)       | 3 (6)       | 18         |
| R <sub>20</sub> Q <sub>10</sub>  |                                                     |    | 3 (6)   | 3 (6)   | 3 (6)                                               | 3 (6)       | 3 (6)       | 3 (6)       | 18         |
| Total                            | 3                                                   | 3  | 39 (78) | 39 (78) | 33 (66)                                             | 33 (66)     | 36 (72)     | 36 (72)     | 222        |

738 A total of 222 mice were infected in both hind footpads. At each time point for footpad CFU counts, 3 mice (6 footpads) were  
739 harvested. For time points after stopping treatment, (+2) and (+4) indicate time points 2 and 4 weeks, respectively, after completing  
740 the indicated duration of treatment. Drug abbreviations: R, Rifampin; C, Clarithromycin; Q, Q203/Telacebec. Drug dose is indicated  
741 by the number in subscript following the drug abbreviation.
